# Supplementary material for: MiR-26a-5p inhibits GSK3β expression and promotes cardiac hypertrophy in vitro
Source: PeerJ journal article supplement (doi:10.7717/peerj.10371), 2020-11-17
Supplement: Raw_data.zip [file Raw_data.zip]

## Sheet: Sheet1
Figure 1C
NC	PE	miR-26a-5p	miR-26a-5p+PE	miR-26a-5p inhibitor	miR-26a-5p inhibitor+PE
1	3.77149	2.65148	7.86563	1.43832	3.19568
1	4.0644	2.64115	8.06451	1.63749	3.24621
1	3.467	2.64437	7.73881	1.43752	3.77111
Figure 1D
NC	PE	miR-26a-5p	miR-26a-5p+PE	miR-26a-5p inhibitor	miR-26a-5p inhibitor+PE
1	1.25318	1.38357	1.61706	0.604027	0.875524
1	1.31862	1.23769	1.55069	0.598622	0.91203
1	1.27998	1.23354	1.5184	0.60552	0.879097
Figure 1E
NC	PE	miR-26a-5p	miR-26a-5p+PE	miR-26a-5p inhibitor	miR-26a-5p inhibitor+PE
1	0.788945	0.850501	0.633753	1.39463	1.13053
1	0.830387	0.961129	0.630011	1.25961	1.09272
1	0.833627	0.956283	0.647136	1.25693	1.10861
